# Supplementary material for: The neural and genetic correlates of satisfying sexual activity in heterosexual pair‐bonds
Source: PubMed Central journal article supplement (PMC6576152; doi:10.1002/brb3.1289), 2019-05-14
Supplement: BRB3-9-e01289-s001.pdf [file BRB3-9-e01289-s001.pdf]

**Supplementary Table 1. Regional Brain Correlations with Sexual Satisfaction Scores in Response to Partner Face vs. HFN Face Images at T1 or T2**

| Brain Region         | Side | x      | y   | z   | T    | p      | k  |
|----------------------|------|--------|-----|-----|------|--------|----|
| <b>Time 1</b>        |      |        |     |     |      |        |    |
| VTA                  | R    | 6      | -6  | -12 | 2.26 | 0.03   | 5  |
| Accumbens            | R    | 13     | 13  | -4  | 2.58 | 0.01   | 7  |
| Caudate body         | R    | 12     | -3  | 18  | 2.54 | 0.01   | 5  |
| Globus pallidus      | R    | 18     | 4   | -5  | 2.58 | 0.05   | 3  |
| Amygdala             | R    | 18     | -6  | -16 | 2.20 | 0.05   | 3  |
| Hypothalamus         | R    | 6      | -6  | -9  | 2.28 | 0.01   | 5  |
| BNST                 | L/R  | -1/2   | 3   | -2  | 3.28 | 0.04   | 7  |
| ACC                  | L/R  | -3/8   | 40  | 12  | 3.52 | 0.01   | 7  |
| Thalamus             | L/R  | -3/5   | -12 | 9   | 2.24 | 0.04   | 5  |
| IFG                  | L    | -60    | 15  | 24  | 2.56 | 0.04   | 7  |
| AG                   | L/R  | -51/57 | -48 | 33  | 3.57 | 0.05   | 7  |
| Ventrolateral PFC    | R    | 45     | 33  | -15 | 2.62 | 0.02   | 5  |
| Dorsomedial PFC      | L    | -3     | 57  | 30  | 2.58 | 0.03   | 4  |
| Medial PFC           | R    | 6      | 54  | 3   | 2.42 | 0.04   | 3  |
| Medial SFG/cingulate | L    | -3     | 33  | 30  | 4.87 | < .001 | 7  |
| Pre/motor cortex     | L/R  | -27/45 | 3   | 51  | 3.04 | 0.004  | 7  |
| <b>Time 2</b>        |      |        |     |     |      |        |    |
| VP                   | L    | -12    | 6   | -6  | 3.02 | 0.03   | 3  |
| Raphé, reticular     | R    | 6      | -14 | -10 | 2.25 | 0.01   | 7  |
| Pons, dorsal         | L    | -15    | -33 | -42 | 2.77 | < .001 | 7  |
| Caudate tail         | L    | -33    | -36 | 5   | 2.04 | 0.001  | 1  |
| Occipital gyrus      | R    | 027    | -54 | 12  | 3.49 | < .001 | 23 |
| SII                  | L    | -36    | -3  | 18  | 1.84 | < .001 | 2  |

HFN= Highly familiar neutral.

**Supplementary Table 2. Sex Satisfaction x Avpr and Oxt Gene Correlations with Human Brain Response to Partner vs HFN Face Images shown at T1 or T2**

| Brain Region                   | Side | x   | y   | z   | T    | p      | k |
|--------------------------------|------|-----|-----|-----|------|--------|---|
| <b>Sex Satisfaction x Avpr</b> |      |     |     |     |      |        |   |
| <b>Time 1</b>                  |      |     |     |     |      |        |   |
| Entorhinal area/hippocampus    | R    | 33  | -14 | -20 | 3.40 | 0.01   | 5 |
| Amygdala                       | R    | 30  | -3  | -18 | 3.07 | 0.02   | 6 |
| Insula                         | L    | -48 | 0   | 6   | 7.08 | ≤ .001 | 7 |
| Inferior frontal gyrus         | L    | -27 | 30  | -9  | 5.27 | ≤ .001 | 7 |
| Orbitofrontal gyrus            | L    | -24 | 36  | -15 | 4.19 | ≤ .001 | 7 |
| SFG                            | L    | -15 | 57  | -3  | 4.21 | ≤ .001 | 5 |
| IPS                            | L    | -15 | -63 | 60  | 4.34 | ≤ .001 | 6 |
| Inferior parietal              | L    | -63 | -24 | 21  | 7.56 | ≤ .001 | 7 |
| SMA                            | L    | -6  | 0   | 60  | 4.39 | ≤ .001 | 7 |
| Dorsolateral PFC               | L/R  | 42  | 42  | 21  | 4.21 | 0.01   | 7 |
| <b>Time 2</b>                  |      |     |     |     |      |        |   |
| Amygdala/entorhinal cortex     | L    | -6  | 0   | -18 | 4.02 | ≤ .001 | 5 |
| Hippocampus, posterior         | L/R  | 18  | -21 | -9  | 6.97 | ≤ .001 | 6 |
| Caudate tail                   | L    | -18 | -36 | 18  | 7.00 | ≤ .001 | 7 |
| Inferior colliculus            | L    | -3  | -33 | -15 | 3.42 | ≤ .001 | 6 |
| Cingulate/orbitofrontal gyrus  | R    | 21  | 33  | 0   | 5.08 | ≤ .001 | 7 |
| Insula, posterior              | R    | 27  | -45 | 27  | 6.54 | ≤ .001 | 7 |
| Frontal sulcus                 | L    | -30 | 3   | 39  | 6.25 | ≤ .001 | 7 |
| Medial frontal gyrus           | L    | -12 | 45  | 24  | 5.98 | ≤ .001 | 7 |

---

*Sex Satisfaction x Ostr*

---

**Time 1**

|                             |     |     |     |       |      |        |   |
|-----------------------------|-----|-----|-----|-------|------|--------|---|
| VTA/SN                      | R   | 6   | -15 | -12   | 3.30 | 0.004  | 6 |
| Entorhinal area/hippocampus | R   | 33  | -12 | -21   | 3.25 | 0.01   | 4 |
| Putamen                     | L   | -24 | 3   | 0     | 4.13 | 0.01   | 7 |
| Thalamus                    | L   | -24 | -24 | 6     | 7.16 | ≤ .001 | 6 |
| Posterior cingulate         | L/R | 0/9 | -30 | 39/45 | 5.53 | ≤ .001 | 7 |
| Mid-insula                  | L   | -42 | 6   | -6    | 6.70 | ≤ .001 | 7 |
| SFG                         | L   | -15 | 57  | -3    | 4.44 | ≤ .001 | 5 |
| Superior temporal gyrus     | R   | 48  | -15 | -12   | 4.43 | 0.01   | 7 |

**Time 2**

|                                |     |    |     |     |      |                   |   |
|--------------------------------|-----|----|-----|-----|------|-------------------|---|
| VTA/SN                         | L   | -4 | -18 | -15 | 2.11 | 0.05 <sup>a</sup> | 3 |
| GP, posterior                  | L/R | 24 | -3  | -6  | 3.20 | 0.02              | 4 |
| Pons/PAG                       | L   | 6  | -33 | -27 | 4.39 | ≤ .001            | 5 |
| Amygdala, central              | R   | 26 | -3  | -12 | 3.05 | 0.04              | 4 |
| Lingual gyrus, BA18            | R   | 3  | -63 | 0   | 5.54 | ≤ .001            | 7 |
| Temporal gyrus/auditory cortex | R   | 51 | -24 | 3   | 4.58 | ≤ .001            | 6 |

HFN= Highly familiar neutral.

**Supplementary Table 3. Regional Brain Correlations with Sexual Frequency Shown in Response to Partner vs. HFN Face Images at T1 or T2**

| Brain Region             | Side | x   | y   | z   | T    | p           | k  |
|--------------------------|------|-----|-----|-----|------|-------------|----|
| <b>Time 1</b>            |      |     |     |     |      |             |    |
| Cingulate gyrus          | R    | 6   | -21 | 42  | 3.52 | $\leq .001$ | 7  |
| Inferior frontal gyrus   | L    | -36 | 30  | -3  | 3.14 | 0.01        | 6  |
| Superior frontal gyrus   | R    | 18  | 27  | 42  | 4.69 | $\leq .001$ | 7  |
| Superior temporal gyrus  | L    | -60 | -39 | 12  | 4.96 | $\leq .001$ | 7  |
| Temporal pole            | L    | -42 | 10  | -35 | 3.08 | $\leq .001$ | 7  |
| Inferior parietal cortex | L    | -27 | -39 | 54  | 3.76 | $\leq .001$ | 7  |
| Parietal operculum/SII   | L    | -48 | -27 | 12  | 4.70 | $\leq .001$ | 7  |
| SMA                      | R    | 3   | 3   | 54  | 3.81 | $\leq .001$ | 7  |
| <b>Time 2</b>            |      |     |     |     |      |             |    |
| Substantia nigra         | R    | 10  | -10 | -12 | 2.41 | 0.04        | 8  |
| Putamen                  | R    | 24  | 6   | 12  | 6.13 | $\leq .001$ | 6  |
| VP/accumbens             | R    | 8   | 4   | -5  | 2.63 | 0.03        | 5  |
| GP, posterior            | R    | 21  | 0   | -6  | 2.70 | 0.03        | 4  |
| Mid-insula               | R    | 44  | 3   | 3   | 4.96 | 0.01        | 18 |
| Medial PFC               | R/L  | 0   | 54  | 3   | 3.01 | 0.01        | 5  |
| Dorsolateral PFC         | L    | -48 | 36  | 27  | 3.83 | $\leq .001$ | 6  |

HFN= Highly familiar neutral.

**Supplementary Table 4. Sex Frequency x Oxttr and Avpr Gene Correlations with Human Brain Response to a Partner vs. HFN Face Images shown at T1 or T2**

| Brain Region                 | Side | x   | y   | z   | T    | p                 | k |
|------------------------------|------|-----|-----|-----|------|-------------------|---|
| <i>Sex Frequency x Oxttr</i> |      |     |     |     |      |                   |   |
| <b>Time 1</b>                |      |     |     |     |      |                   |   |
| VP                           | L/R  | -15 | -3  | -3  | 2.77 | 0.05 <sup>a</sup> | 4 |
| Caudate, head                | L    | -15 | 19  | 13  | 3.29 | 0.04 <sup>a</sup> | 3 |
| Hippocampus                  | R    | 27  | -12 | -30 | 3.38 | ≤ .001            | 4 |
| Cingulate                    | R    | 6   | -18 | 45  | 4.99 | ≤ .001            | 5 |
| IFG/frontal operculum        | L    | -57 | 12  | 12  | 4.81 | ≤ .001            | 7 |
| Angular gyrus                | R    | 45  | -69 | 18  | 4.58 | ≤ .001            | 7 |
| Middle temporal gyrus        | R    | 42  | -15 | -12 | 4.77 | ≤ .001            | 7 |
| Superior temporal gyrus      | L    | -30 | -30 | 15  | 5.42 | ≤ .001            | 7 |
| Prefrontal cortex            | L    | -30 | 42  | 24  | 5.85 | ≤ .001            | 7 |
| <b>Time 2</b>                |      |     |     |     |      |                   |   |
| Thalamus                     | R    | 21  | -27 | 9   | 4.16 | ≤ .001            | 6 |
| Hippocampus/entorhinal area  | R    | 27  | -9  | -12 | 3.44 | 0.003             | 6 |
| Hypothalamus/BNST            | L/R  | -6  | 3   | -6  | 4.14 | 0.001             | 5 |
| Middle frontal gyrus         | R    | 42  | 33  | 42  | 2.75 | ≤ .001            | 7 |
| IPS                          | R    | 48  | -45 | 60  | 4.37 | ≤ .001            | 6 |
| Premotor cortex/caudate      | R    | 24  | -12 | 33  | 6.39 | ≤ .001            | 4 |

---

*Sex Frequency x Avpr*

---

**Time 1**

---

|                        |     |        |     |     |      |        |   |
|------------------------|-----|--------|-----|-----|------|--------|---|
| Parahippocampal gyrus  | L/R | -27/42 | -24 | -27 | 4.95 | ≤ .001 | 7 |
| Insula                 | L   | -30    | -30 | 15  | 6.13 | ≤ .001 | 7 |
| Inferior frontal gyrus | L/R | -33/39 | 15  | -15 | 4.74 | ≤ .001 | 7 |
| Middle frontal gyrus   | R   | 27     | -3  | 60  | 8.47 | ≤ .001 | 7 |

---

**Time2**

---

|                      |     |       |     |      |      |        |   |
|----------------------|-----|-------|-----|------|------|--------|---|
| VTA/SN               | L/R | -6/6  | -15 | -18  | 4.92 | ≤ .001 | 6 |
| Caudate, head        | L/R | -16   | 24  | 9    | 4.07 | ≤ .001 | 4 |
| Cingulate/caudate    | L/R | -9/21 | 30  | -6/0 | 5.07 | ≤ .001 | 7 |
| Cingulate gyrus      | R   | 18    | -12 | 48   | 5.10 | ≤ .001 | 7 |
| Anterior cingulate   | R   | 3     | 3   | 24   | 4.86 | ≤ .001 | 6 |
| Inferior colliculus  | L   | -3    | -33 | -15  | 4.18 | ≤ .001 | 6 |
| Thalamus             | R   | 9     | -9  | 24   | 6.17 | ≤ .001 | 7 |
| Amygdala             | L   | -6    | 0   | -18  | 3.95 | ≤ .001 | 6 |
| Hippocampus          | L   | -30   | -18 | -18  | 5.06 | ≤ .001 | 4 |
| Anterior insula      | R   | 27    | 33  | -3   | 3.80 | 0.002  | 4 |
| Medial frontal gyrus | L   | -12   | 45  | 24   | 6.24 | ≤ .001 | 7 |
| Orbitofrontal gyrus  | R   | 24    | 42  | -3   | 3.91 | ≤ .001 | 7 |
| IPS                  | R   | 21    | -36 | 30   | 6.10 | ≤ .001 | 7 |
| SII                  | R   | 51    | -39 | 18   | 4.61 | ≤ .001 | 7 |

---

HFN= Highly familiar neutral.
